# Supplementary material for: Factors of soil diversity in the Batumi delta (Georgia)
Source: Copernicus journal article supplement (doi:10.5194/se-8-1-2017), 2017-01-03
Supplement: Supplementary file 1 [file se-8-1-2017-supplement.zip]

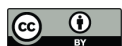

## *Supplement of*

## **Factors of soil diversity in the Batumi delta (Georgia)**

**Bülent Turgut and Merve Ateş**

*Correspondence to:* Bülent Turgut (bturgut@artvin.edu.tr)

- se-8-1-2017-supplement-title-page.pdf
- Copy of Supplementary file.xlsx

The copyright of individual parts of the supplement might differ from the CC-BY 3.0 licence.
